# Supplementary material for: Polyphenols extracted from huangjiu have anti-inflammatory activity in lipopolysaccharide stimulated RAW264.7 cells
Source: Royal Society of Chemistry journal article supplement (doi:10.1039/c8ra09671f), 2019-01-01
Supplement: c8ra09671f1.pdf [file c8ra09671f1.pdf]

## Supplementary material

Figure S1 Extraction and purification of Huangjiu polyphenol extract (HPE).

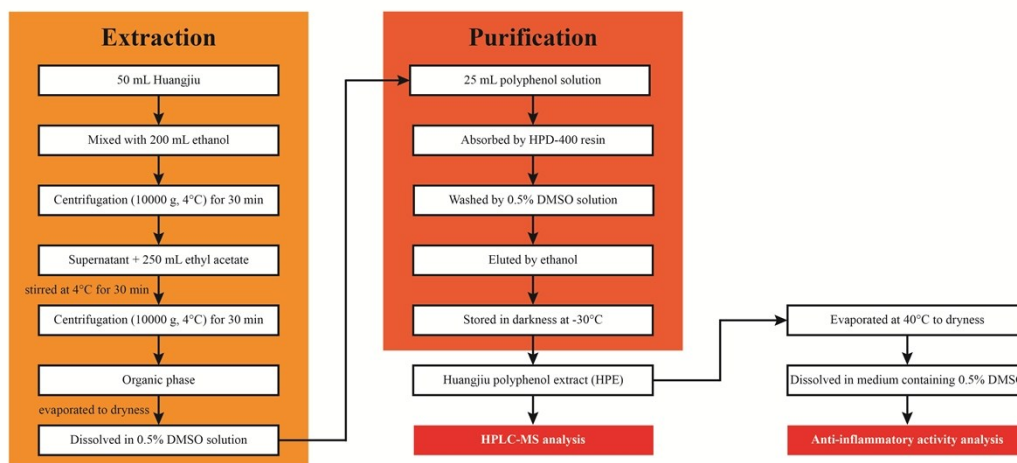

Figure S2 Chromatographic profile of Huangjiu polyphenol extract (HPE).

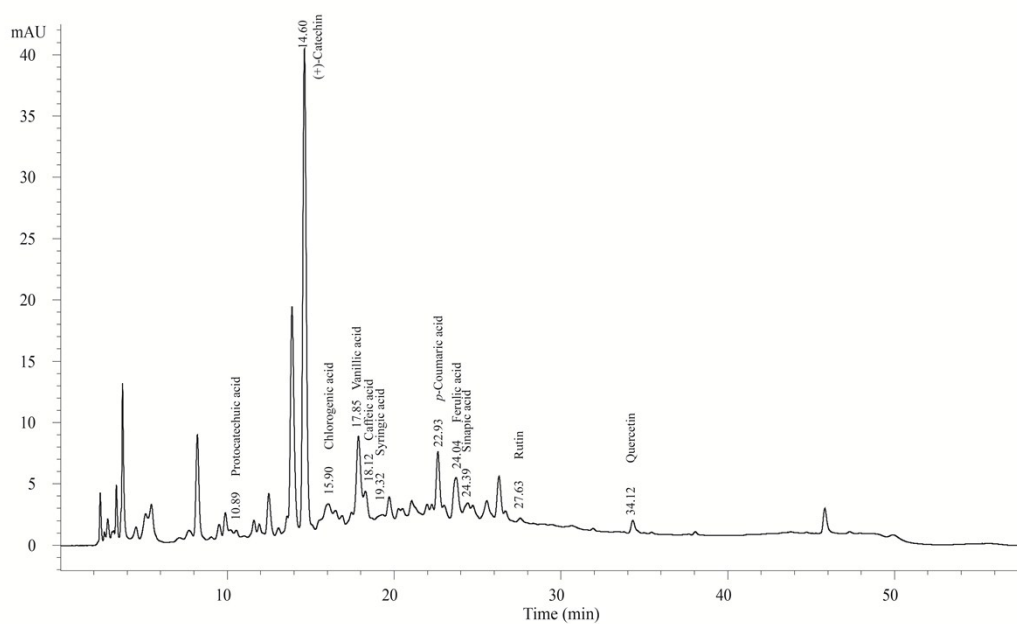

Figure S3 Effect of huangjiu polyphenol extract (HPE) on cell viability of RAW264.7 macrophages.

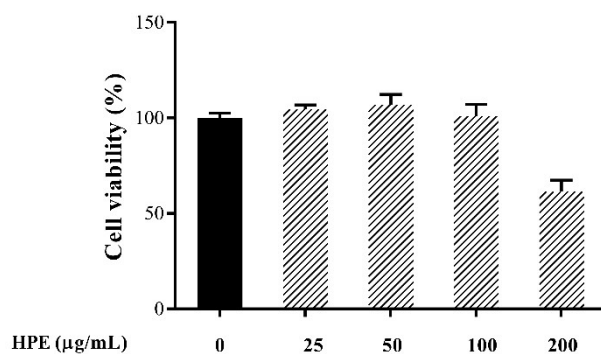

Table S1 Polyphenols yield during extraction and purification.

| Samples       | Volum<br>e (mL) | Polyphenol<br>(mg) | Polyphenol<br>yield (%) | Removal of<br>protein (%) | Removal of total sugar<br>(%) |
|---------------|-----------------|--------------------|-------------------------|---------------------------|-------------------------------|
| Huangjiu      | 117             | 54.61±1.84         | 100                     | 100                       | 100                           |
| Organic phase | 617             | 50.30±1.52         | 92.10±1.27              | 37.02±2.51                | 84.09±2.41                    |
| 0.5% DMSO     | 26              | 25.95±0.76         | 47.52±1.21              | 44.08±0.94                | 84.24±1.35                    |
| HPE           | 10              | 12.32±0.34         | 22.57±0.83              | 90.57±1.10                | 97.99±0.22                    |

Table S2 Polyphenols yield during extraction by ethyl acetate. During extraction, 100 mL huangjiu was mixed with equal volume of ethyl acetate, and organic and water phase were obtained after centrifugation (10000 g, 4°C).

| Organic solvent | Sample        | Volume (mL) | Total<br>polyphenol (mg) | Yield (%)  |
|-----------------|---------------|-------------|--------------------------|------------|
| Ethyl acetate   | Huangjiu      | 100         | 54.61±1.84               | 100        |
|                 | Organic phase | 100         | 7.01±0.34                | 12.83±0.84 |
|                 | Water phase   | 100         | 43.9±0.61                | 80.39±1.41 |
